# Supplementary material for: DNA methylation at hepatitis B viral integrants is associated with methylation at flanking human genomic sequences
Source: PubMed Central journal article supplement — Genome Res. 2015 Mar;25(3):328–37. doi: 10.1101/gr.175240.114 (PMC4352876; doi:10.1101/gr.175240.114), 2015-03

### Supplementary Table 1 Primers and probes used in the analysis

#### Primers for methylation analysis in HBx

|                      |                                                                                          |       |
|----------------------|------------------------------------------------------------------------------------------|-------|
| HBx GM8F1            | TGGTTGTTNGGNTGTGTTGTTAAT                                                                 | 309bp |
| HBx GM8R1            | [Biotin]ACATTANTANNAATCCAAAAATCCTCTTNT                                                   |       |
| HBx GM8S1            | NGGNTGTGTTGTTAATTG                                                                       |       |
| Sequence to Analyze1 | GATTTTTYGYGGGAYGTTTTTTGTTTAYGTTYGTYGGYGTGAA<br>TTTTYGYGGAYGATTTTTTTTYGGGGTYGTTGGGGTTTTAT |       |
| Sequence to Analyze2 | GATTTTGYGYGGGAYGTTTTTTGTTTAYGTTYGTYGGYGTGAA<br>TTTTYGYGGAYGATTTTTTTTYGGGGTYGTTGGGGTTTTAT |       |

type-C AB033550) "GATTTTTYGYGGGAYG" and AB205119 (Genotype-B AB205119) "GATTTTGYGYGGGAYG"

#### Probes for detection of HBV using FISH technique in PLC/PRF/5 cell line

|               |                                                   |     |
|---------------|---------------------------------------------------|-----|
| FISH probe 1  | GATTCCTAGGACCCCTGCTC<br>ATGAGGCATAGCAGCAGGAT      | 429 |
| FISH probe 2  | TTCTCTTCATCCTGCTGCT<br>AAGCCCTACGAACCACTGAA       | 312 |
| FISH probe 3  | ATGTTTCCCTCTTGTTGCTG<br>ATAGAGGTAAAAGGGACTCAAGATG | 264 |
| FISH probe 4  | TATTGGGGGCCAAGTCTGTA<br>CAAGGCAGGATAGCCACATT      | 302 |
| FISH probe 5  | GCTTTCACCTTCTCGCCAAC<br>CTAGCAGCCATGAAAAGGAG      | 298 |
| FISH probe 6  | CGTGGAACCTTTGTGTCTCC<br>GAAGAAGGGGACGGTAGAGG      | 262 |
| FISH probe 7  | TTGCCAAGGTCTTACACAAG<br>ATACGGGTCAATGTCCATGC      | 281 |
| FISH probe 8  | AGCACCATGCAACTTTTTCC<br>GCCTGAGTGCTGTATGGTGA      | 536 |
| FISH probe 9  | TGGGTGGGAAGTAATTTGGA<br>GAGGCGAGGGAGTTCTTCTT      | 321 |
| FISH probe 10 | CCGCTTACAGACCACCAAT<br>CAGAGGGCCCACATATTGTT       | 325 |
| FISH probe 11 | CCCTCCTTTCCTCACATTCA<br>ACCAACCTCCCATGCTGTAG      | 326 |
| FISH probe 12 | CTACAGCATGGGAGGTTGGT<br>CTGCTGGCAGTGTTGTCAAT      | 278 |

#### Primers for detection of integration sites using Alu PCR technique (Originated from Murakami et al)

|                           |                                           |
|---------------------------|-------------------------------------------|
| UP5 Alu-sense             | CAGUGCCAAGUGUUUGCUGACGCCAAAGUGCUGGGAUUA   |
| T3-515 Alu-antisense      | AUUAACCCUCACUAAAGCCUCGAUAGAUYRYRCCAYUGCAC |
| UP6 Alu-sense (tag)       | CAAGTGTGCTGACGCCAAAG                      |
| midT3 Alu-antisense (tag) | ATTAACCTCACTAAAGCCTCG                     |
| pUTP HB1(HBVx)            | ACAUGAACCUUUACCCCGUUGC                    |
| MM37 HB2(HBVx)            | TGCCAAGTGTGCTGACGC                        |
| MM60 HB3(HBVx)            | CTGCCGATCCATACTGCGGAAC                    |

**Primers for methylation analysis of integration sites in PLC/PRF/5**

|                          |                                      |     |
|--------------------------|--------------------------------------|-----|
| PLC/PRF/5 Chr3a-312-F1   | AGTTTTTTTATGTAAGATTTTGGGTAGG         | 312 |
| PLC/PRF/5 Chr3a-312-R1   | [Biotin]CTTTTATAACAAATCAAACCACCTTTTA |     |
| PLC/PRF/5 Chr3a-312-S1   | GTAAGATTTTGGGTAGGA                   |     |
| PLC/PRF/5 Chr3b-266-F2   | AGAGTTTGGAAAGATAAATTTTGATT           | 266 |
| PLC/PRF/5 Chr3b-266-R2   | ACCCCCACTAACTAAAACCTTAACTATA         |     |
| PLC/PRF/5 Chr3b-266-S2   | TGGAAAGATAAATTTTGATTTTATT            |     |
| PLC/PRF/5 Chr4-342-F1    | GGGAGTAATGGAATGATAGAATAGTTATG        | 342 |
| PLC/PRF/5 Chr4-342-R1    | ACTCTATATTTCCCTCATATTACTATACAA       |     |
| PLC/PRF/5 Chr4-342-S1    | ATTAATTGTTTTATGAAGGGT                |     |
| PLC/PRF/5 Chr5-309-F1    | TGGGGTTTGGTTATGGGTTATTA              | 309 |
| PLC/PRF/5 Chr5-309-R1    | AAATTCAAACAATATCCACACT               |     |
| PLC/PRF/5 Chr5-309-S1    | GTTTGGTTATGGGTTATTAG                 |     |
| PLC/PRF/5 Chr8-332-F2    | GGATTAAAGATAGGGATAGTAGAGGA           | 332 |
| PLC/PRF/5 Chr8-332-R2    | ACAAATATTTACTAAACCATACCCAATTAT       |     |
| PLC/PRF/5 Chr8-332-S2    | ATGAGTTTAAGGAATATTAATATTG            |     |
| PLC/PRF/5 Chr10-221-F2   | TGATGATTGTATTYGGGTTTATGGATTA         | 221 |
| PLC/PRF/5 Chr10-221-R2   | ATTCAAACAATCCAAACTAAAACCTTCA         |     |
| PLC/PRF/5 Chr10-221-S2   | ATTTTATTTTATTTTATTAGATGAT            |     |
| PLC/PRF/5 Chr11a-301-F2  | GGGAGGGGTTGAATTTGGT                  | 301 |
| PLC/PRF/5 Chr11a-301-R2  | AACCCACAAATTATTAACACCTAT             |     |
| PLC/PRF/5 Chr11a-301-S2  | GATGTATTGAGTTGTAGTTTAGTTA            |     |
| PLC/PRF/5 Chr11b-262-F2  | GGTTGGAAGGYGTGGTTTTAGT               | 262 |
| PLC/PRF/5 Chr11b-262-R2  | ACTAACACCCRCATAAACACTTACAT           |     |
| PLC/PRF/5 Chr11b-262-S2  | GGAAGGYGTGGTTTTAGTT                  |     |
| PLC/PRF/5 Chr12a-294-F1  | GAGTTGGGTAAATTGAGTTATAGAAGT          | 294 |
| PLC/PRF/5 Chr12a-294-R1  | CCTATATCCCATCCCATCATCT               |     |
| PLC/PRF/5 Chr12a-294-S1  | AATTGAGTTATAGAAGTTGG                 |     |
| PLC/PRF/5 Chr12b-340-F1  | GTTTTGATTGGTTGGTTTGAAGT              | 340 |
| PLC/PRF/5 Chr12b-340-R1  | ACTAACACCCCCATAAACACTTACAT           |     |
| PLC/PRF/5 Chr12b-340-S1  | ATTGGTTGGTTTGAAGTA                   |     |
| PLC/PRF/5 Chr13-245-F1   | GGTTTTTYGTTTGTGTTTTGTTATTTG          | 245 |
| PLC/PRF/5 Chr13-245-R1   | ACCTAACACCTCCATATATAATTTATCAT        |     |
| PLC/PRF/5 Chr13-245-S1   | GTGTATATTTGTTTTATTTTGTGA             |     |
| PLC/PRF/5 Chr16a-241-F1  | GAATTTTAGAGGGTTGGGATAGATA            | 241 |
| PLC/PRF/5 Chr16a-241-R1  | CTAAACAAAAAATTAACCTTATTATCCT         |     |
| PLC/PRF/5 Chr16a-241-S1  | AGTTTTTGTTTTAAGAATATGG               |     |
| PLC/PRF/5 Chr16b-391-F1  | TGTGTGGTATTTTGTATGGTAGTT             | 391 |
| PLC/PRF/5 Chr16b-391-R1  | AAAAAATTCTTCTTCTAAAAAACCTAC          |     |
| PLC/PRF/5 Chr16b-391-S1  | TTTGTATGGTAGTTTTAGTAAA               |     |
| PLC/PRF/5 Chr17a1-305-F1 | GATGGTATTGTAGGATGTTGAGAGTAGT         | 305 |
| PLC/PRF/5 Chr17a1-305-R1 | CCCACCCAAATAACTAAAATCATTAATTCC       |     |
| PLC/PRF/5 Chr17a1-305-S1 | TTTTAGAGTTTTATTTTAGGTGGA             |     |
| PLC/PRF/5 Chr17b-266-F1  | GGATTGAGTGTGATAATAGGAGAGTA           | 266 |
| PLC/PRF/5 Chr17b-266-R1  | ACCAACCTCCTATCCTCCAATTTA             |     |
| PLC/PRF/5 Chr17b-266-S1  | GGGGAGGGAGGTTTA                      |     |



Supplementary Table 3 Chromosome ideograms (PLC/PRF/5 and HepG2215)

| cell lines | Band     | Position                  | * Giemsa stain results | Level |  |                                |
|------------|----------|---------------------------|------------------------|-------|--|--------------------------------|
| PLC/PRF/5  | 3q22.1   | chr3:129200001-133700000  | gpos25                 | 1     |  | Giemsa stain negative (gneg) 0 |
| PLC/PRF/5  | 3q22.1   | chr3:129200001-133700000  | gpos25                 | 1     |  | Giemsa stain 25 (gpos25) 1     |
| PLC/PRF/5  | 4q34.3   | chr4:177500001-183200000  | gpos100                | 4     |  | Giemsa stain 50 (gpos50) 2     |
| PLC/PRF/5  | 5p15.33  | chr5:1-4500000            | gneg                   | 0     |  | Giemsa stain 75 (gpos75) 3     |
| PLC/PRF/5  | 8p12     | chr8:28800001-36500000    | gpos75                 | 3     |  | Giemsa stain 100 (gpos100) 4   |
| PLC/PRF/5  | 10q11.21 | chr10:42300001-46100000   | gneg                   | 0     |  |                                |
| PLC/PRF/5  | 11q13.1  | chr11:63400001-65900000   | gneg                   | 0     |  |                                |
| PLC/PRF/5  | 11q13.1  | chr11:63400001-65900000   | gneg                   | 0     |  |                                |
| PLC/PRF/5  | 12q24.11 | chr12:109000001-111700000 | gneg                   | 0     |  |                                |
| PLC/PRF/5  | 12q24.11 | chr12:109000001-111700000 | gneg                   | 0     |  |                                |
| PLC/PRF/5  | 16q22.1  | chr16:66700001-70800000   | gneg                   | 0     |  |                                |
| PLC/PRF/5  | 17q25.3  | chr17:75300001-81195210   | gneg                   | 0     |  |                                |
| PLC/PRF/5  | 17q25.3  | chr17:75300001-81195210   | gneg                   | 0     |  |                                |
| HepG2215   | 1p31.1   | chr1:69700001-84900000    | gpos100                | 4     |  |                                |
| HepG2215   | 2p12     | chr2:75000001-83300000    | gpos100                | 4     |  |                                |
| HepG2215   | 4q34.3   | chr4:177500001-183200000  | gpos100                | 4     |  |                                |
| HepG2215   | 7q11.22  | chr7:67000001-72200000    | gpos50                 | 2     |  |                                |
| HepG2215   | 10q21.1  | chr10:52900001-61200000   | gpos100                | 4     |  |                                |
| HepG2215   | Xq23     | chrX:108700001-116500000  | gpos75                 | 3     |  |                                |
| HepG2215   | M9       | chrM:9,084-9,653          | N/A                    |       |  |                                |

\* Furey TS and Haussler D. Integration of the cytogenetic map with the draft human genome sequence, Hum Molec Genet. 2003;12(9):1037-44.

\* BAC Resource Consortium, Cheung VG, Nowak N, Jang W, Kirsch IR, Zhao S, Chen XN, Furey TS, Kim UJ, Kuo WL et al.. Integration of cytogenetic landmarks into the draft sequence of the human genome, Nature. 2001;409:953-98.



## Supplementary Information

### Figure legends for Supplementary Figures

**Supplementary Fig 1 CGI mapping of the HBV genome.** (A) Overview of the MCAM analysis. MCAM analysis was performed to detect methylated genes in the human PLC/PRF/5 cell line and in six paired specimens of primary HBV-HCC and adjacent tissues. (B) Gene-tree view of the MCAM analysis results. A set of 714 probes (514 unique genes) was selected, and hierarchical clustering was performed. Each row represents a single probe. Compared with the DNA methylation of CGIs in the healthy peripheral blood leukocytes of volunteers or the non-cancerous tissues, levels of DNA methylation were not remarkable in the PLC/PRF/5 cells and the cancerous tissues obtained from HBV-HCC patients.

**Supplementary Fig 2 CGI mapping of the HBV genome.** (A) Structure of the HBV genome. The CGI is shown as a dark box. (B) DNA sequence of the HBV genome genotype A. The CGI is shown.

**Supplementary Fig 3 HBV genotypes.** HBV genotypes were derived from Drummond AJ, Ashton B, Buxton S, Cheung M, Cooper A, Duran C, Field M, Heled J, Kearse M, Markowitz S, Moir R, Stones-Havas S, Sturrock S, Thierer T, Wilson A (2011) Geneious v5.5, which is available at <http://www.geneious.com>.

**Supplementary Fig 4 FISH analysis of HBV integration.** A FISH analysis was used to detect HBV DNA and demonstrate its presence in the genome of PLC/PRF/5 cells. (A) The positions of the original FISH probes 1–12 are shown. These probe designs were based on the reference HBV DNA sequence. FISH probes 6–7 correspond to the *HBx* gene. (B) When anti-DIG-HRP, biotin-tyramide, and Alexa488 (TSA-Bio) were used, the fluorescent signals with the best signal-to-noise ratio were detected. (C)-(E) The fluorescent signal was detected

in the nuclei using probes that detect the *HBx* gene ((C) probes 5 and 6; (D) probe 5; (E) probe 6).

**Supplementary Fig 5 Identification of the host genome integration sites for *HBx* using an Alu-PCR method.** Chromosomal locations of viral-host junctions were analyzed using the Alu-PCR method. The 200-bp promoter region and 13-bp segment of the *HBx* gene body from the *HBx* primer position are shown. *HBx* integration was detected in host Chromosome 5.

**Supplementary Fig 6 Analysis of the HBV DNA integration site sequences using NGS.** (A) NGS-based structural methylation analysis using the G-NaVI method. (B) HBV specific genome capture. A total of 12,391 custom baits was synthesized based on the sequences of the HBV genotypes A to J and on those sequences present in the HBV-transformed PLC/PRF/5 cells that were not related to the sequence of the human genome. (C) Distribution of the numbers of library reads and read lengths from four paired clinical samples, PLC/PRF/5 cells, and HepG2.2.15 cells. Average read length was 333.14 bp with a modal length of approximately 500 bp.

**Supplementary Fig 7 The methylation levels of the HBV genome and the PLC/PRF/5 genome based on the chromosomal integration site.** DNA methylation of the integrated HBV genome as well as the flanking human genome was analyzed by bisulfite pyrosequencing. Pyrograms of integration site at the Chromosomes 3 and 4 (A), Chromosomes 5, 8, and 10 (B), Chromosomes 11 and 12 (C), and Chromosomes 16 and 17 (D) are shown. Varying levels of methylation of the HBV sequences integrated into the genome of PLC/PRF/5 cells were detected.

**Supplementary Fig 8** Distribution of the integration sites in the HBV genome and human chromosomes represented by Circos plots of the tumor (T) and adjacent non-tumor (ADJ) sample genomes. HBV DNA integration was analyzed using the G-NaVI method in four surgical specimen pairs of HCC and adjacent non-tumor tissues. Integration sites were rarely detected in exonic regions of the DNA from HBV-HCC samples. The HBV genes (PreC, Precore; C, Core; PreS, Presurface; S, Surface; X, X) and the 24 human chromosomes are shown.

Supplementary Figure 1

A

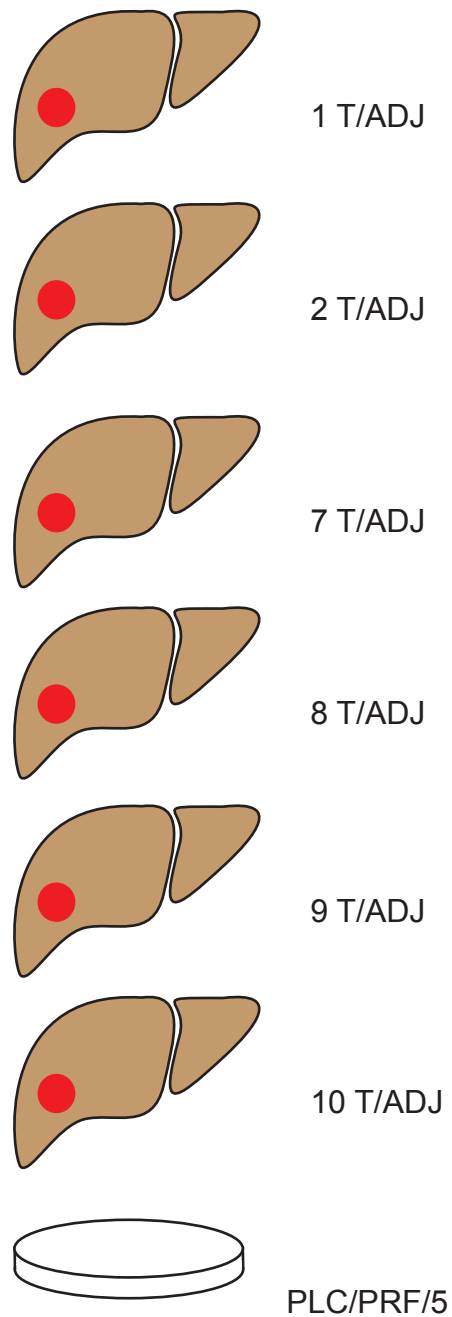

B

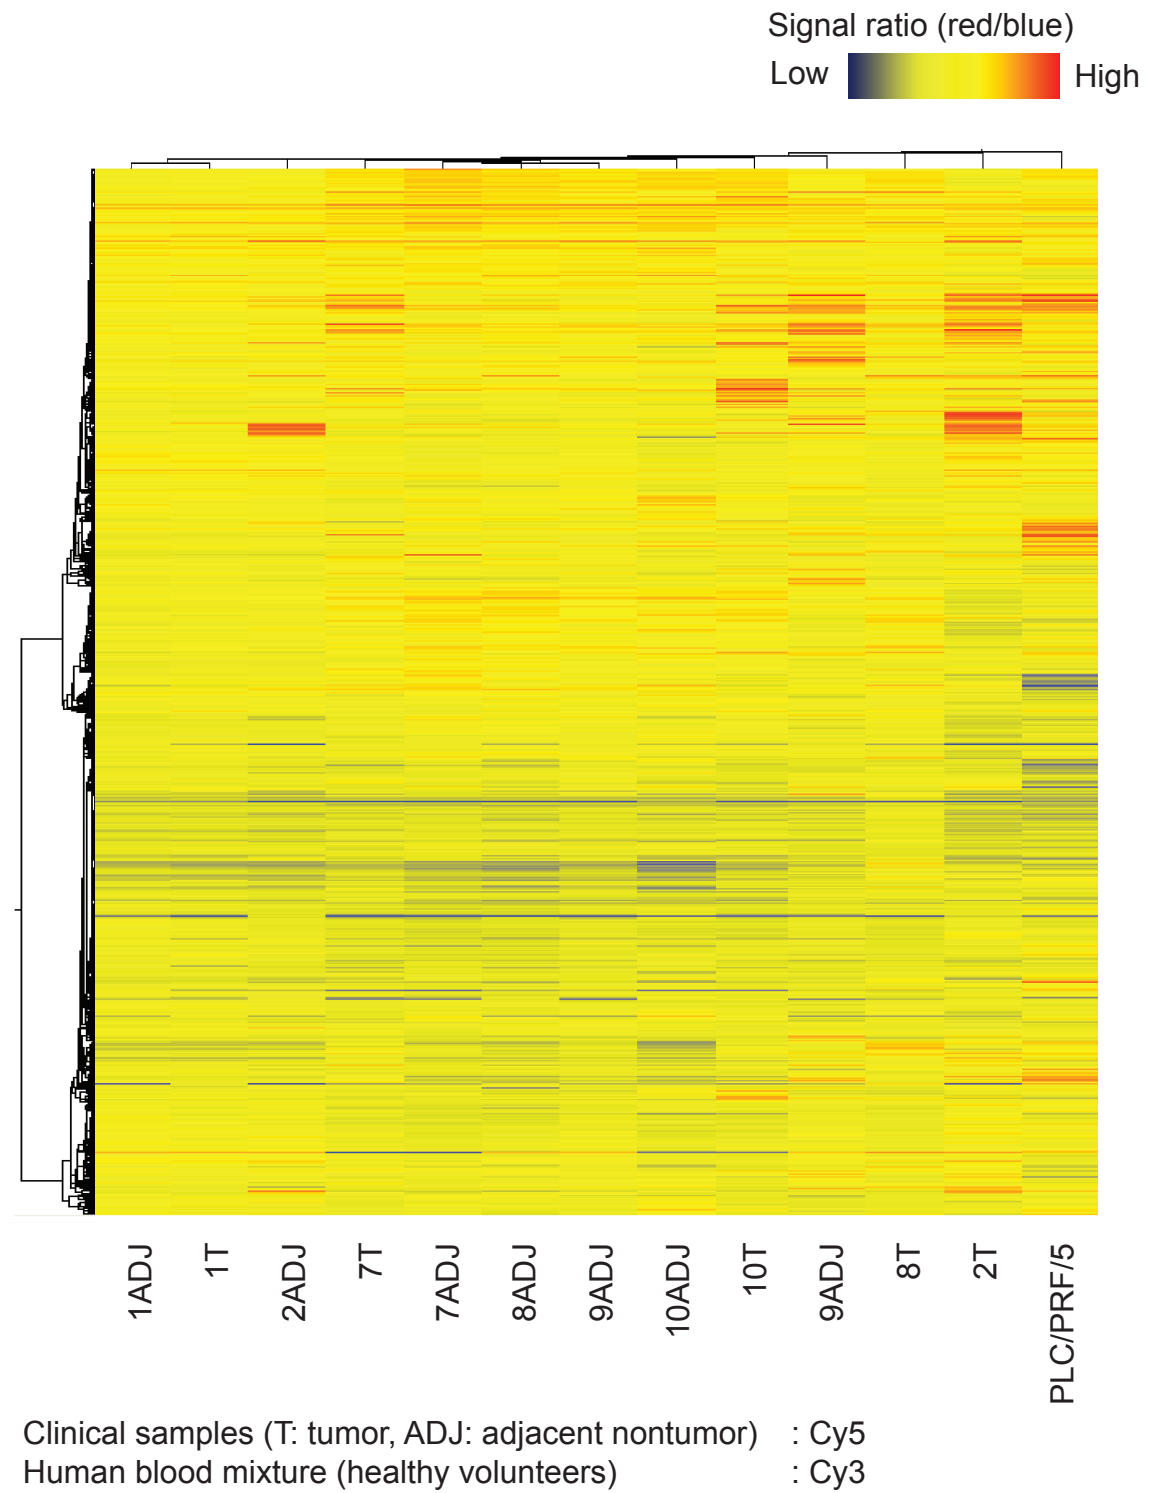

Supplementary Figure 2

**A**

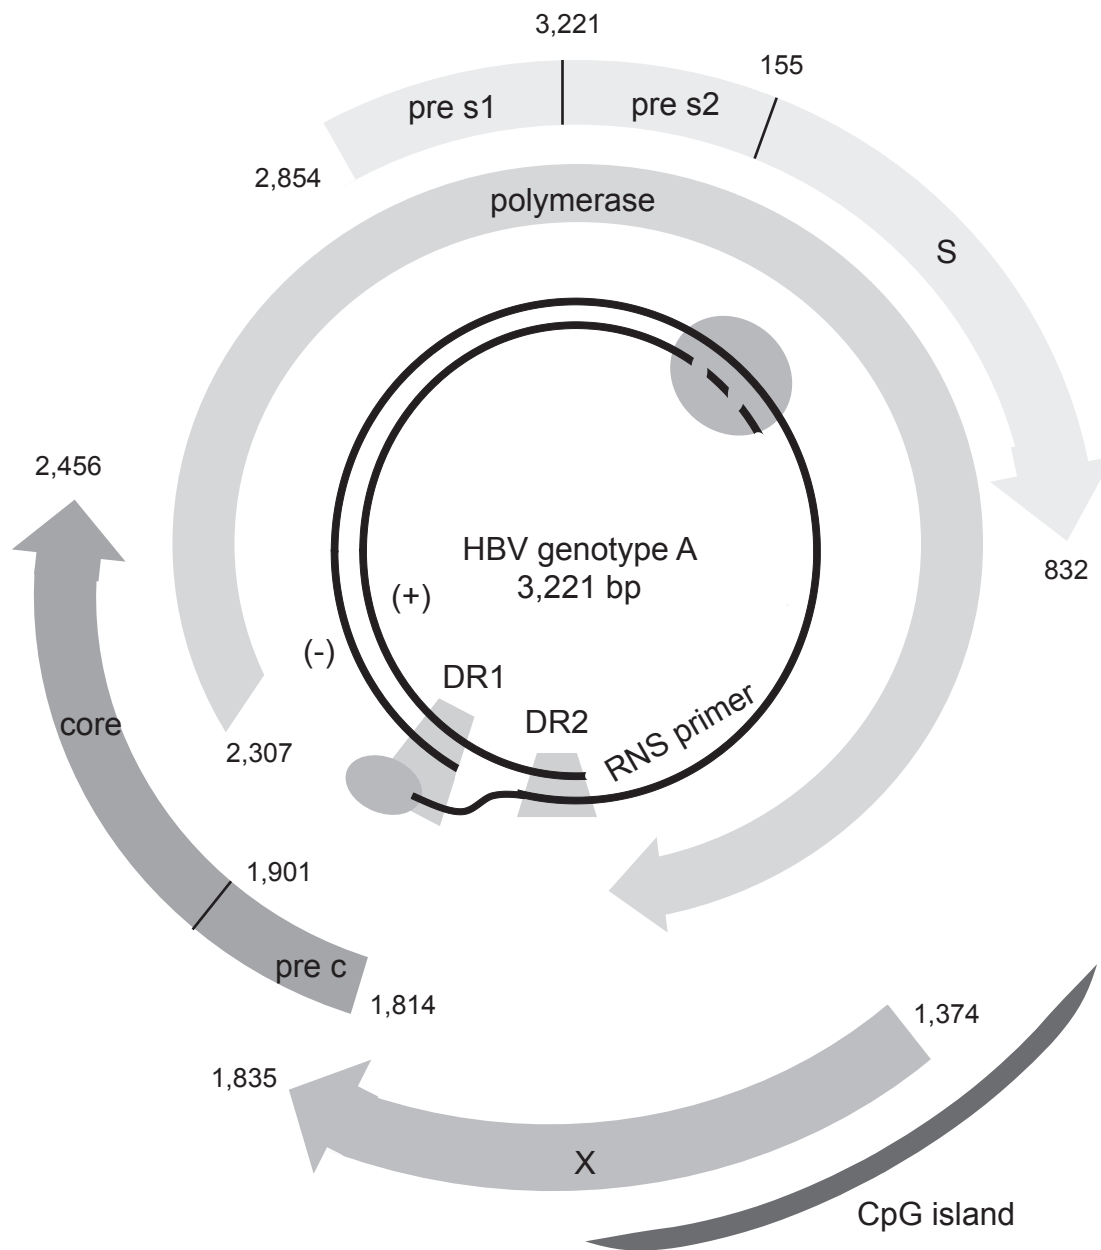

**B**

HBV genotype A

```

TTCCACAGCTTTCCACCAAGCTCTGCAAGATCCCAGAGTCAGGGGCTGTATTTTCCTG
CTGGTGGCTCCAGTTCCGGAACACTCAACCCTGTTCACACTATTGCCTCTCACATATCG
TCAACCTCCTCGAGGATTGGGGACCCTGCGGCGAACATGGAGAACATCACATCAGGATT
CCTAGGACCCCTGCTCGTGTACAGGCGGGGTTTTCTTGTGTGACAAGAATCCTCACAA
TACCGCAGAGTCTAGACTCGTGGTGGACTTCTCTCAGTTTTCTAGGGGGACCACCCGTG
TGTCCTGGCCAAAATTTCGAGTCCCAACCTCCAATCACTCACCAACCTCCTGTCTCTCC
AACTTGTCTCGTTATCGCTGGATGTGTCTGCGGCGTTTTATCATATTCCTCTTCATCC
TGCTGCTATGCCTCATCTTCTTATTGGTTCTTCTGGATTATCAAGGTATGTTGCCCGTT
TGTCCTCTAATTCCAGGATCAACAACAACCAGCACGGGACCCTGCAAAACCTGCACGAC
TCCTGCTCAAGGCAACTCTATGTTTCCCTCATGTTGCTGTACAAAACCTACGGATGGAA
ATTGCACCTGTATTCCCATCCCATCATCTTGGGCTTTTCGCAAAATACCTATGGGAGTGG
GCCTCAGTCCGTTTTCTCTGGCTCAGTTTACTAGTGCCATTTGTTAGTGGTTCCGTAGG
GCTTTCCCCACTGTTTGGCTTTCAGTTATATGGATGATGTGGTACTGGGGGCCAAATC
TGTACAACATCTTGAGTCCCTTTATACCGCTGTTACCAATTTTCTTTTGTCTTTGGGTA
TACATTTAAACCCTAACAAAACAAGAGATGGGGTTACTCCCTAAATTTTCATGGGTTAT
GTAATTGGAAGTTGGGGTACATTGCCACAGGATCATATTGTACAAAAAATCAAACACTG
TTTTAGAAAACCTCCTGTCAATCGACCTATTGATTGGAAAGTATGTCAGAGAATTGTGG
GTCTTTTGGGCTTTGCCGCTCCATTTACACAATGTGGGTACCCTGCCTTAATGCCTTTG
TATGCATGTATAACAATCGAAACAGGCTTTTACTTTCTCGCCAACCTACAAGGCTTTCT
AAGTAAACAGTATATGAACCTTTACCCCGTTGCCCGCAACCGCTGGTCTGTGCCAAG
TGTTTGCTGACCGCAACCCCCACTGGCTGGGGCTTGGCCATCGGCCATCAGCGCATGCGT
GGAACCTTTGTGGCTCCTCTGCCGATCCATACTCGGAACTCCTAGCCGCTTGTTTTGC
TCGCAGCCGGTCTGGAGCAAACCTCATCGGGACTGATAATTCTGTGCTCCTTTCTCGGA
AATATACATCATTTCCATGGCTGCTAGGTTGTACTGCCAAGTGGATTCTTCGCGGGACG
TCCTTTGTTTACGTCCCGTTCGGCGTGAATCCCGGGACGACCCTCGCGAGCCGCTT
GGGGCTGTATCGTCCCTTCTCCGTCTGCCGTACCGTCCGACCAGGGGGCGCACCTCTC
TTTACGCGGTCTCCCCGTCTGTGCCTTCTCATCTGCCGACCGTGTGCACCTCGCTTCA
CCTCTGCACGTTGCATGGAGACCACCGTGAACGCCCATCAGGTCCTGCCAAGGTCTTA
CATAAGAGGACTCTTGGACTCCCAGCAATGTCAACGACCGACCTTGAGGCCTACTTCAA
AGACTGTGTGTTTAAAGACTGGGAGGAGTTGGGGGAGGAGACTAGATTAATGATCTTTG
TATTAGGAGGCTGTAGGCATAAATTGGTCTGCGCACCATCCTCATGCAACTTTTACC
TCTGCCTAATCATCTCTTGTACATGTCCACTTTTCAAGCCTCCAAGCTGTGCCTTGGG
TGGCTTTGGGGCATGGACATTGACCCTATAAAGAATTTGGAGCTACTGTGGAGTTACT
CTCATTTTGCCTTCTGACTTCTTTCTTCCGTTTCGGGATCTACTAGATACAGCCTCAG
CTCTATATCGGGAAGCCTTAGAGTCTCCTGAGCATTGCTCACCTACCATAACAGCACTC
AGGCAAGCCATTCTCTGCTGGGGGAATTAACGACTCTAGGTACTGGGTGGGTAATAA
    
```

CpG island

A

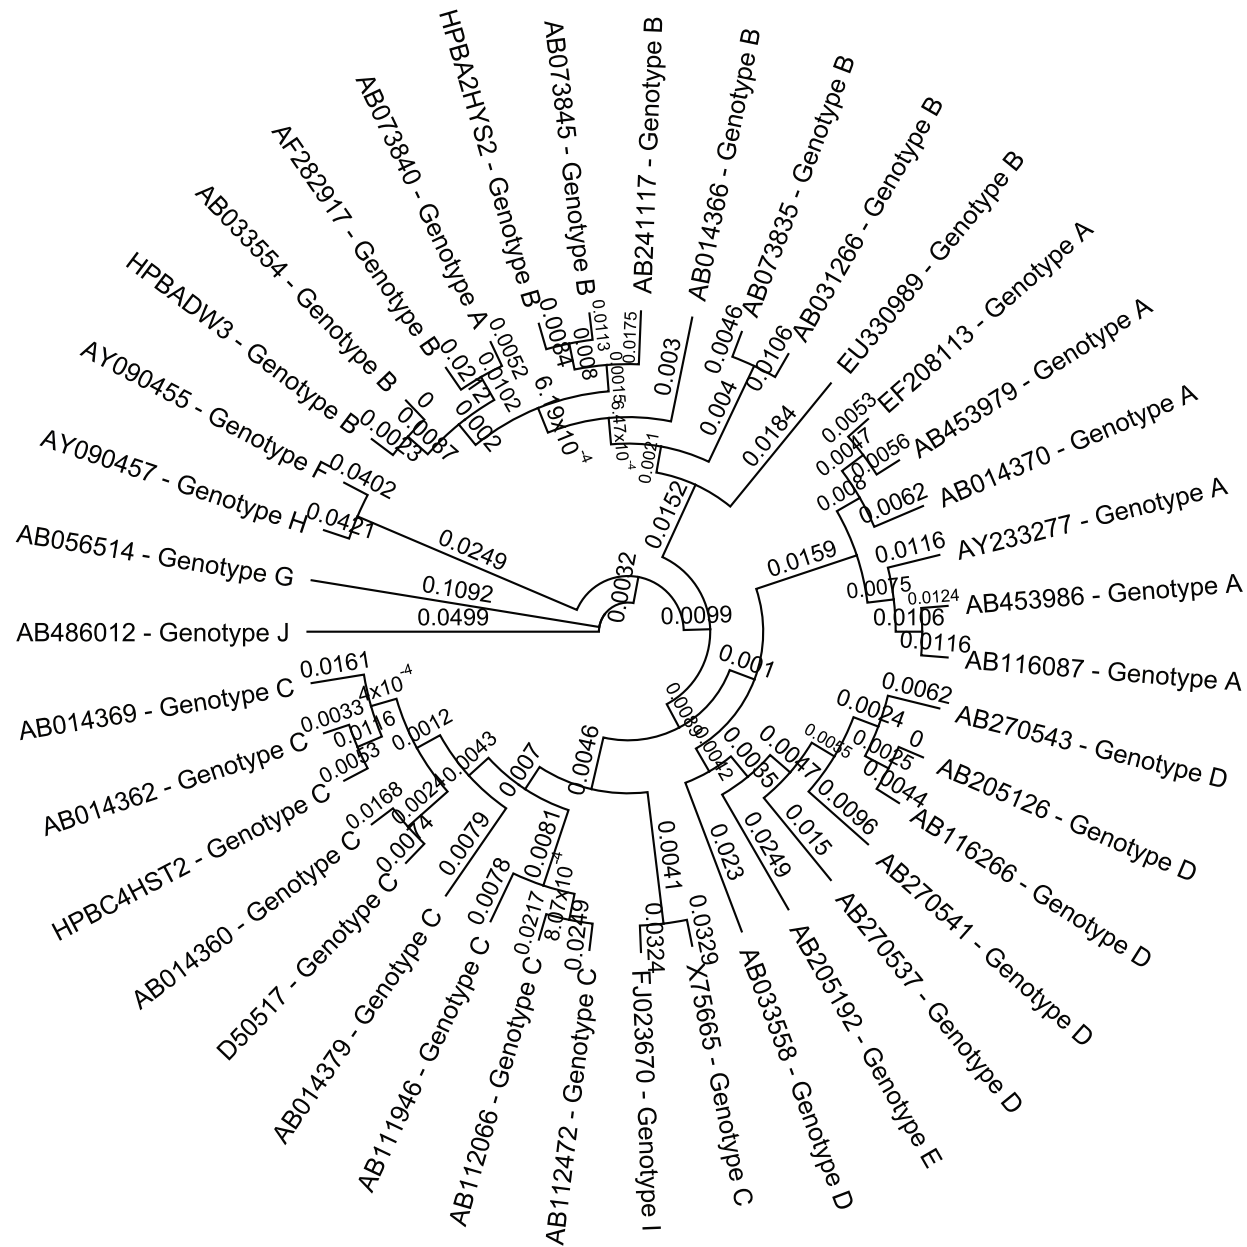

B

| Accession No. | Subtype | Country      |
|---------------|---------|--------------|
| AB014370      | Ae      | Japan        |
| EF208113      | Ae      | Germany      |
| AB453979      | Ae      | Japan        |
| AY233277      | Aa      | South Africa |
| AB116087      | Aa      | India        |
| AB453986      | Aa      | Japan        |
| AB014366      | B1(Bj)  | Japan        |
| D23678        | B1(Bj)  | Japan        |
| AB073845      | B1(Bj)  | Japan        |
| AB073840      | B2(Ba)  | Taiwan       |
| AF282917      | B2(Ba)  | China        |
| D00331        | B3      | Indonesia    |
| AB033554      | B3      | Indonesia    |
| AB031266      | B4      | Vietnam      |
| AB073835      | B4      | Vietnam      |
| AB241117      | B5      | Philippines  |
| EU330989      | B6      | China        |
| AB111946      | C1      | Vietnam      |
| AB112066      | C1      | Myanmar      |
| AB112472      | C1      | Thailand     |
| AB014360      | C2      | Japan        |
| AB014379      | C2      | Japan        |
| AB014362      | C2      | Japan        |
| AB014369      | C2      | Japan        |
| D50517        | C2      | Japan        |
| D23681        | C2      | Japan        |
| X75665        | C3      | Polynesia    |
| AB270541      | D1      | Mongolia     |
| AB270543      | D1      | Mongolia     |
| AB205126      | D2      | Japan        |
| AB116266      | D2      | Japan        |
| AB270537      | D3      | Mongolia     |
| AB033558      | D4      | Japan        |
| AB205192      | E       | Ghana        |
| AY090455      | F       | Nicaragua    |
| AB056514      | G       | USA          |
| AY090457      | H       | Nicaragua    |
| FJ023670      | I       | Laos         |
| AB486012      | J       | Japan: Ryuku |

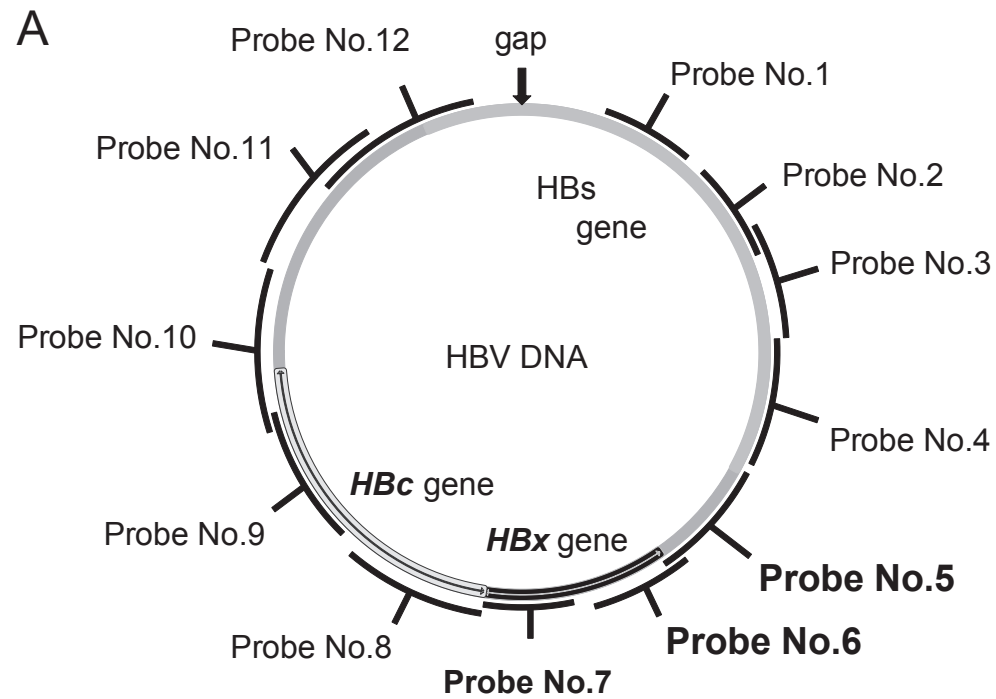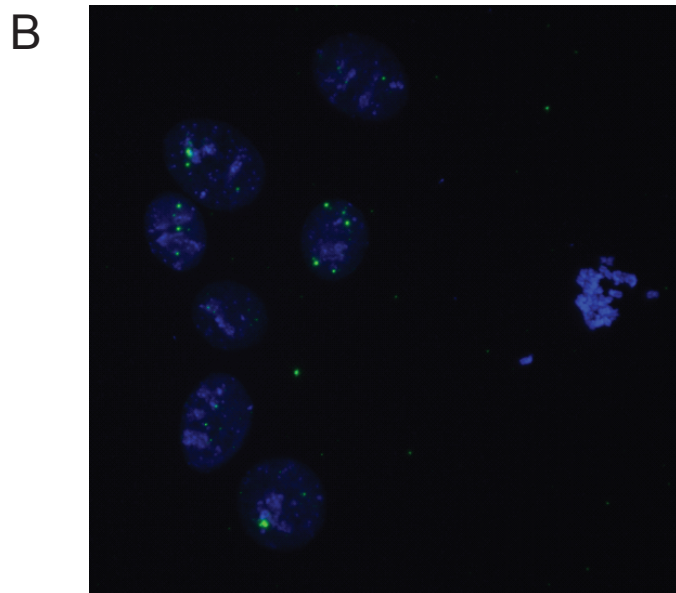

No.1 – No.12 dig probe  
 (anti dig-HRP, biotin-tyramide + Alexa 488-streptavidin)

**C**

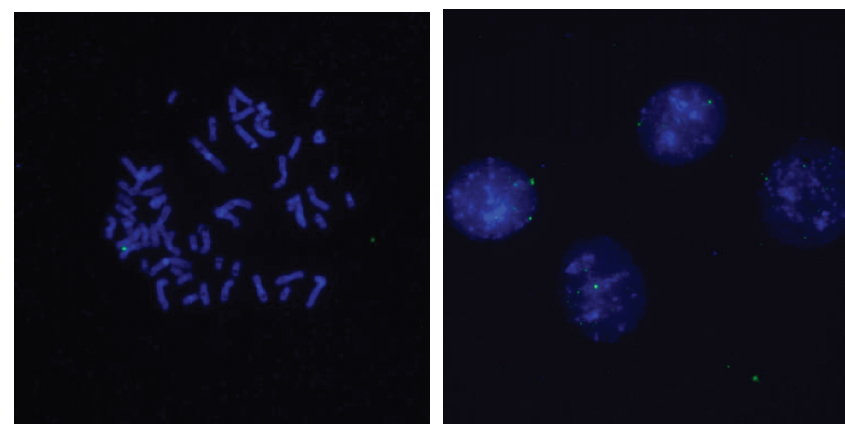

Metaphase Interphase  
 No.5 + 6 dig probe (anti dig-HRP, biotin-tyramide + Alexa 488-streptavidin)

**D**

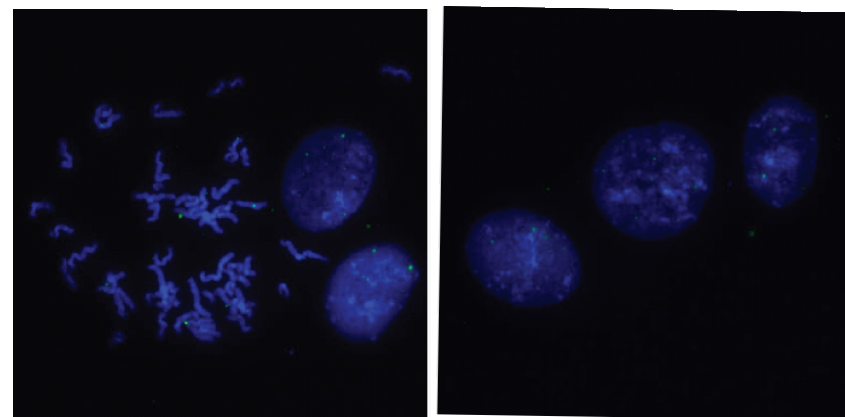

Metaphase Interphase  
 No.5 dig probe (anti dig-HRP, biotin-tyramide + Alexa 488-streptavidin)

**E**

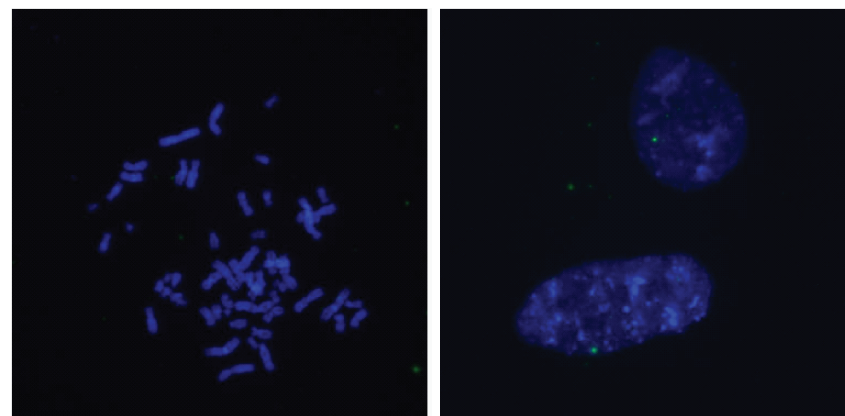

Metaphase Interphase  
 No.6 dig probe (anti dig-HRP, biotin-tyramide + Alexa 488-streptavidin)

Supplementary Figure 5

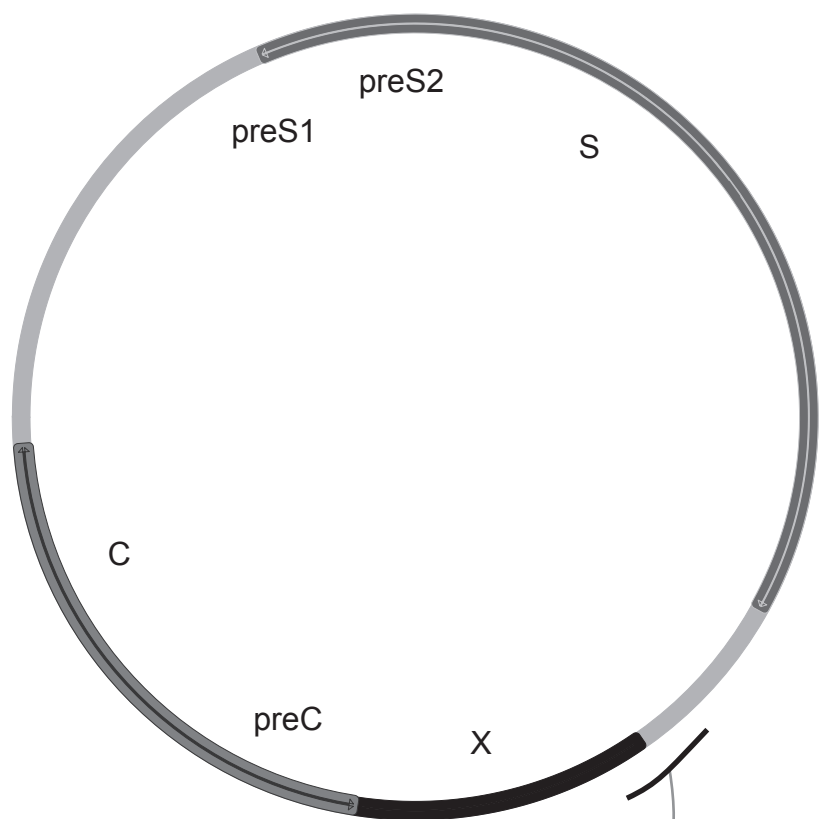

HBx primer

TGCCAAGTGTTTGCTGACGCAACCCCCACTGGCTGGGGCTT  
GGCTATGGGCCATCAGCGCATGCGTGGAACCTTTGTGGCTC  
CTCTGCCGATCCATACTGCGGAACTTCTTGCAGCTTGTTTTG  
CTCGCAGCCGGTCTGGAGCAAACCTCATTGGGACTGATAATT  
CTGTCGTCCTTTCTCGGAAATATACATCATTTCCATGGCTGCT

AGGT

HBV genome

Human genome

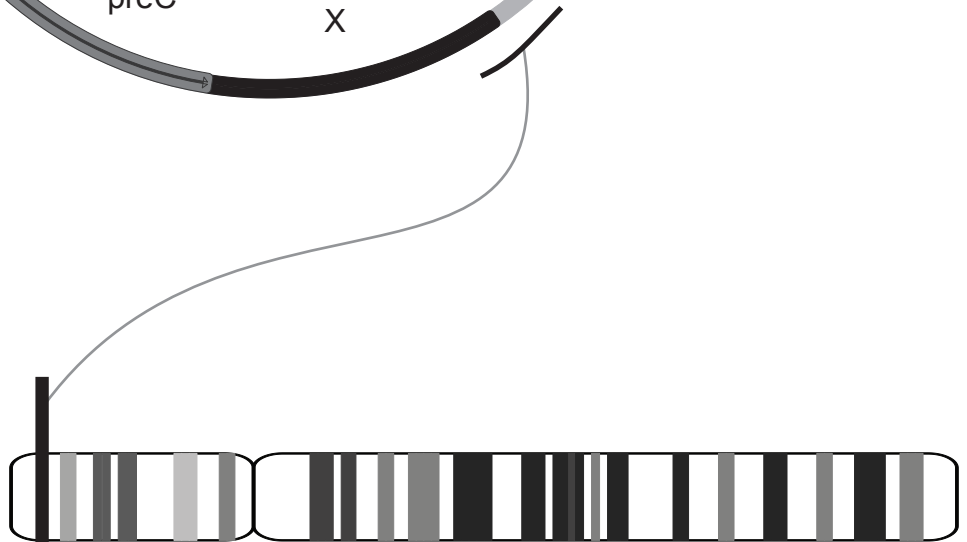

chr5:1,350,106-1,350,478

TGTTATCCCATGGGACCCACTCAGGGGCAGCTGGGAGG  
CTGCAGGCTTCAGGTTCCAGTGGGGTTGCCATCTGCCAGTAG  
AAACCTGATGTAGAATCAGGGCGCGAGTGTGGACACTGTCCT  
GAATCTCAATGTCTCAGTGTGTGCTGAAACATGTAGAAATAAA  
GTCCATCCCTCCTACTCTACTGNGATTGAGCCCCTTCCCTATC  
CCCCCCCAGGGGCAGAGGAGTTCCTCTCTCTCCTGTGGAGG  
AAGGAATGATACTTTGTTATTTTTCACTGCTGGTACTGAATCCA  
CTGTTTCATTTGTTGGTTTGTGTTTGTGTTTGTGTTTGTGAGAGGCGGTT  
TCACTCTTGTTGCTCAGGCTGGAGGGAGTGCAATCGCACGAT  
CTATCGAGGCTTTAGTGAGGGTTAAT

Alu primer



Supplementary Figure 6

**A**

1. DNA extraction
2. Sonication
3. HBV specific genome capture
4. Isolation of DNA with HBV integration
5. Removal of baits
6. Sequencing

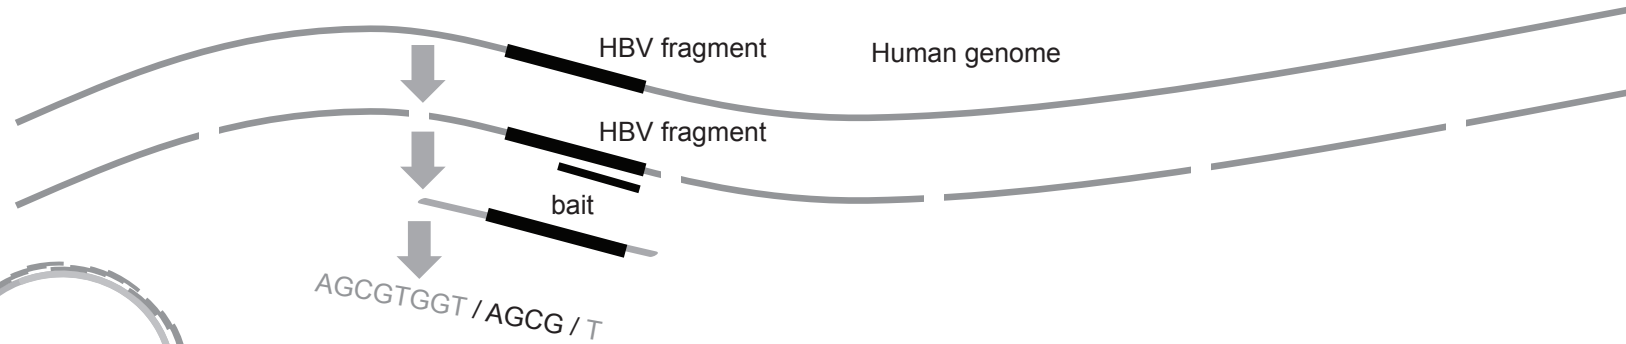

**B**

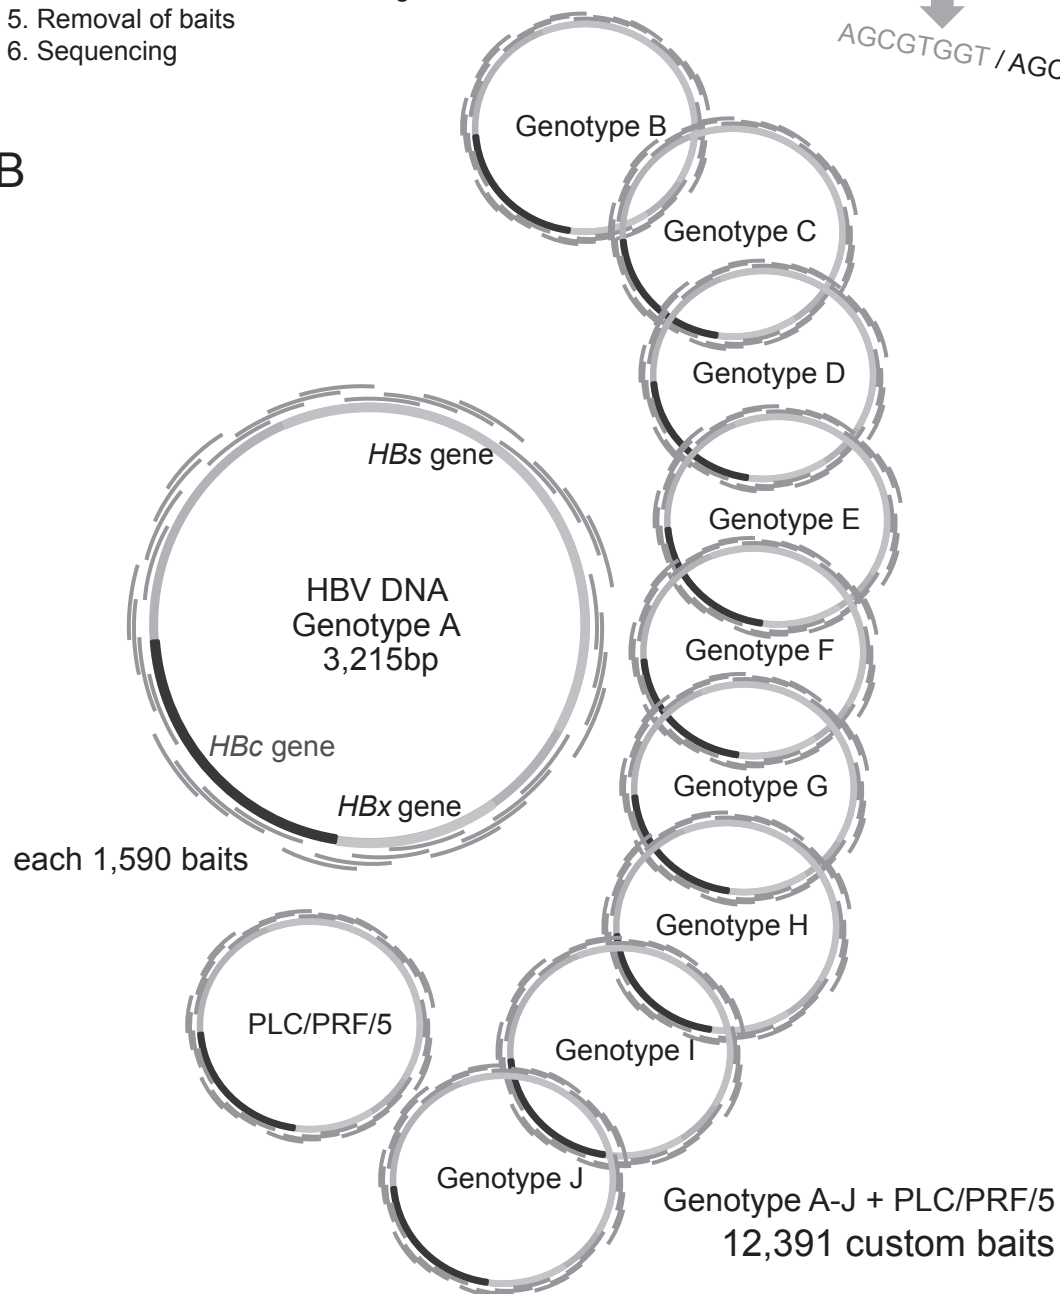

**C**

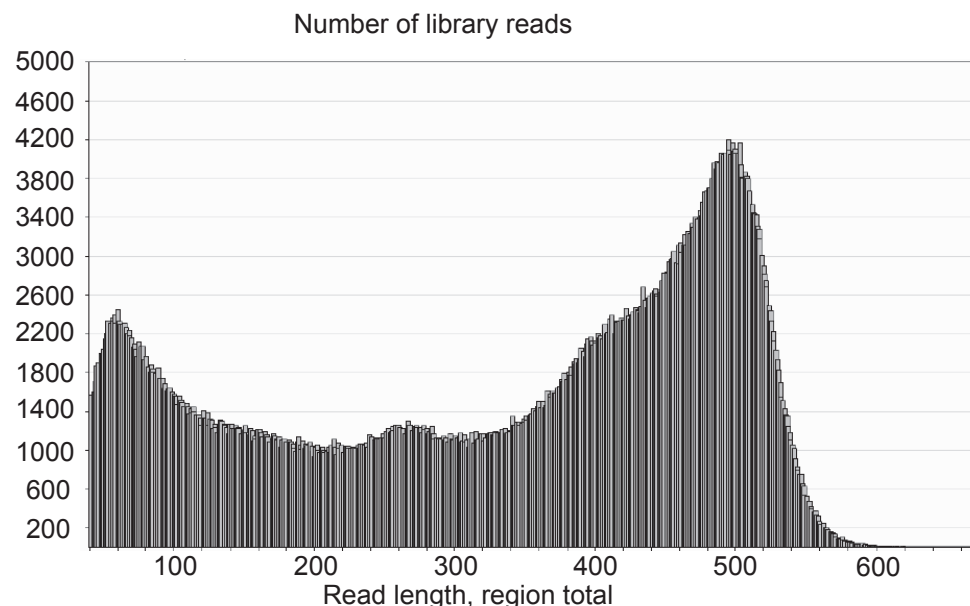

| Sample ID  | Read length distribution |             | Avg. Length |
|------------|--------------------------|-------------|-------------|
|            | PF Reads                 | PF Bases    |             |
| 07 T       | 60,998                   | 20,800,711  | 341,01      |
| 07 ADJ     | 91,162                   | 29,668,293  | 325,45      |
| 08 T       | 88,642                   | 26,859,198  | 303,01      |
| 08 ADJ     | 89,639                   | 28,188,759  | 314,47      |
| 09 T       | 94,782                   | 30,324,876  | 319,94      |
| 09 ADJ     | 99,326                   | 31,727,377  | 319,43      |
| 10 T       | 102,284                  | 32,951,383  | 322,16      |
| 10 ADJ     | 97,838                   | 30,572,394  | 312,48      |
| PLC/PRF/5  | 92,551                   | 29,705,733  | 320,97      |
| HepG2 2215 | 102,103                  | 34,399,441  | 336,91      |
| Total      | 920,260                  | 306,575,998 | 333,14      |



# Supplementary Figure 7B PLC/PRF/5 Chromosome 5

HBV Genome
  Human Genome
  Primers
  Sequencing
  CG

## Allele A: integration site

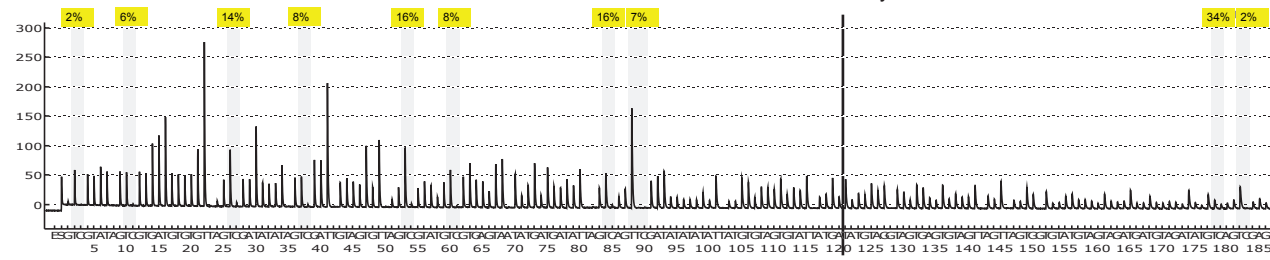

## Allele A: integration site

```

GCTGTTTTAGGAACTTCCTGTCAATCGACCTATTGATTGAAAGTATGTCAAAGAATTGTGGTCT
TTTGGGCTTTGCGCGCCCTTTACACAATGTGGTTACCCTGCCTTAATGCCTTTATATGCATGTATA
CAAGCAAACAGGCTTTTACTTTCTCGCCAACCTACAAGGCTTTCTAAGTAAACAGTATATGAACC
TTTACCCCGTTGCCCGGCAACGGCCTGGCCTGTGCCAAGTGTGTGTGACGCAACCCCACTGGCCG
GCGCTTGGCTATGGGCCATCACGCGCATCGGGGAACCTGTGTGGCTCCTCTGCCGATCCATACTGCG
GAACTCCTTGCAGCTTGTCGTTTGTCGCAGCCGGTCTGGAGCAAACCTCATTTGGACTGATAATTCTG
TCGCTCCTTCTCGGAAATATACATCATTTCCATGGCTGCTAGTGTCGTATCCCATGGGACCCACTGC
AGGGCAGCTGGGAGGCTGCAGGCTTCCAGGTCCAGTGGGGTGGCCATCTGCCAGTAGAAACCTGAT
GTAGAATCAGGGCGCGAGTGTGGACACTGCTCCTGAATCTCGCAATGCTCAGTGTGTGCTGAAACATGT
AGAAATTAAGTCCATCCCTCCTACTCTACTGGGATTGAGCCCTTCCCTACTCCCCCCCCACGGGC
AGAGGAGTTCCCTCCTCCTCTGTGGAGGAAGGAATGATACTTTGNTTATTTTCTACTGCTGGTACT
GAATCCACTGTTTCATTTGTTGGTTTGTCGTTGT
    
```

## Allele A: integration site

Sense TGGGGTTTGGTTATGGGTATTA  
 Anti-sense AAATCAAACAATATCCCACT  
 Sequencing GTTGGTTATGGGTATTAG

## Allele B: non-integration site

Sense AGGGTTTAATTTAGTAGAGTAGG  
 Anti-sense TCAAATCCCAATAAAATTACCATCTAC  
 Sequencing TGAGATTAGGATAGTGTTA

# Chromosome 8

## Allele A: integration site

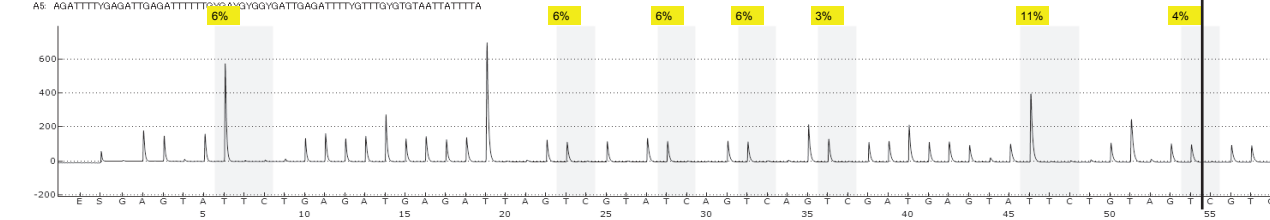

## Allele A: integration site

```

TTCTCTTTTCATTTACAGTGAGAGGGCTACAATATGCTGACACCTATTAATAATGTCTCTCGTGTAA
ATGGATTTTAGGAAAGGAAGCGTTTGCATTCACGGATTAAAGATAGGGACAGTAGAGGACGATAAAGC
CCAGTAAATTTCCACCTTATGAGTCCAAGGAATACTAACATTGAGATTCCCGAGATTGAGATCTT
CTGCGACGCGCGATTGAGATCTTCGCTCGCGTGTAATTACTTTATGCATTTGATCTTTATGTTTAA
TTCTTTAACCTCCATAGCATTGTTTATTTGATATAAGATGATGATCTAATTTTAAAAACTAAA
AAAAAAGTAATTACCAAGTGAATTAACTAATTCATTCCCTTGTCACTTTAAAAAAGCCTAGCAA
ACGAATACTGGGTATGGTTTAGTAAATTTGTCGTAAATAATGAGTTTCATTAGACATCTCCAATCTC
AGAAATTCCTGTGTGTTTAAATGAAGGTTTTCAGTTTCCCTACCCCTTTTCTAATTTCGCAAATTC
    
```

## Allele A: integration site

Sense GGATTAAAGATAGGGATAGTAGAGGA  
 Anti-sense ACAAATTTACTAAACCATACCCAATTAT  
 Sequencing ATGAGTTAAGGAATATTAATATTG

## Allele B: non-integration site

no CG site in human genome

# Chromosome 10

## Allele A: integration site

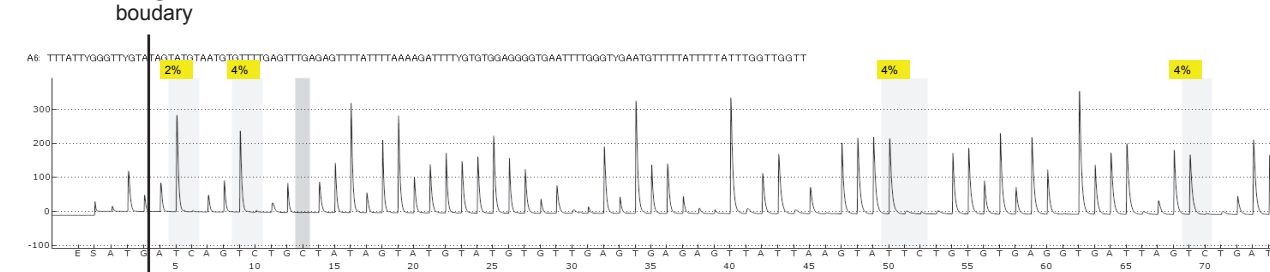

## Allele A: integration site

```

CCATTCAATTCCGTTCAATGTTCCATTaGATTCCATcTGATGaTGATTCCATTCGGATTCCATTTgA
TGATGATTCCATCGCGATTCCATTAGATGATGACTCCTTTCATTTCATTCGGATGATGATTCCATTCG
TTTCCATCTGATGATGATTCCATTCGATTCGTTCAATGATTATTCATTCGGAGTCCATTCGGATGAT
TCCATTCGGATTCTATTCGATGATGATTGCATTCGGGTCCATGGATTCGATTCCATTCCATTCCATTAGA
CGTGATTCCATTCGGGTCCCGCACAGTATGCAATGTGCTTGGCTTGAGCCTGAGAGCTCCACCCAAAAGACCT
CGGTGTGGAGGGTGAACCTTGGCCCGAATGCTCCCACTCCTACCTGGTTGGCTTGTGGCCAGTGGT
CCTTTGTGGGGTCGTGAAGTCCAGTCTGGATTGTTTGAATCGTGGCTCCGAATGCTGGGTCCAACAGTATG
ATCGGGAAAGAATCCCAGAGGGTGGGGACAGACAGATTCGTCCCATGCCTTTTCGGAGGTTTGGT
AACCAACCTCCCATGATGTAGCTCTGTTCCCAAGAATATGGTGACCCGCAAAATGAGGCGCTACGT
    
```

## Allele A: integration site

Sense TGATGATTGTATTYGGGTTTATGGATTA  
 Anti-sense ATTCAAACAATCCAAACTAAAACCTCA  
 Sequencing ATTTTATTTTATTTTATTAGATGAT

## Allele B: non-integration site

no CG site in human genome

# Supplementary Figure 7C PLC/PRF/5 Chromosome 11

HBV Genome   
  Human Genome   
  Primers   
  Sequencing   
  CG

## Allele A: integration site

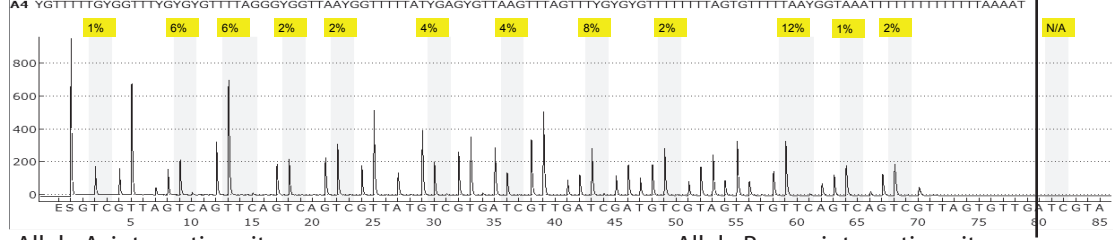

## Allele A: integration site

Sense GGGAGGGGTTGAATTTGGT  
 Anti-sense AACCCACAATTTAACACCTAT  
 Sequencing GATGTATTGAGTTGTAGTTAGTTA

## Allele B: non-integration site

Sense GGGGYGGGTTGAATTTGTT  
 Anti-sense CCCCCAAACCAATTCCTAATTTACT  
 Sequencing GATGTATTGAGTTGTAGTTAGTTA

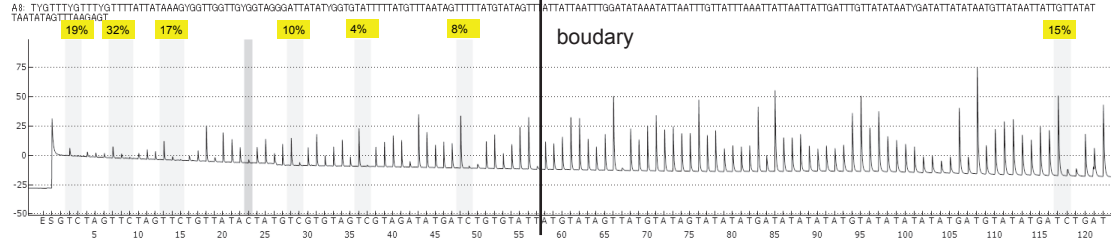

## Allele A: integration site

Sense GGTGGAAGGYTGGTTTTAGT  
 Anti-sense ACTAACACCCRCATAAACACTTACAT  
 Sequencing GGAAGGYTGGTTTTAGTT

## Allele B: non-integration site

N/A

## Allele A: integration site

TCGTGGGACGCGCAGTGGTGGGAAAGCAGCGAGGCCGGGGCGGGGGTGGGGAGCGGCCGGTGG  
 GGGCGGGGCTGAACCTGGCTGGGCCCGCCTTCCCGCATGANTCCCGGCCTTCGGGCGCCCACTC  
 GAGCCACCTCTGTCTCTCACCCAGTCCAGTTCGAGTTGGCCTCCGAGATGCACCTGGTTGTAGTCC  
 AGCTACGCCTCTCGGGCTCGCGCGCTCTAGGGCGGCTAACCGCCCCCATCGAGCGCCAAGTTCAGC  
 TTTCGGCGCTCCCCCTTAGTGTTTTAAACGCAAACTCCTTCCTTCCATAAATTCATTACATGAGG  
 ATGTTATTAATAGGTGTCAACAATTTGTGGGCCCTCTCAACGTAATGAAAACAAAGATTGAACCT  
 AATTATGCCTGCTAGGTTTTATCCTAACTCCACTAAATATTTGCCTTAGACAAGGAATTAAGCCT  
 TATTATCCTGAACATGTGGTAACTACTTCCAATCTCGGCACTATTTACATAAGCTTTGGAAGG  
 CGGGTATTTTATATAAGAGAGAAACATCCACAAAGCCTCATTCTTTGGGTACCATATTTCTGGGA  
 ACAAGAGCTACATCATGGGGTTTCTTGGACGGTCCCTCTCGAGTGGGGGAAGAATCAGTCCACCAG  
 CAATCCACTGGGATTTTTTCCCGACCACAGTTGGATCCAGCATTGGAGCCAACCTCAACAATCCA

## Allele A: integration site

GAGCCGGTTTATTGGGTGGAAGGACGAAGGAGAGGACCCAAAGCCCGGGTACTTGTCTCAGAGGC  
 CCCAAAGCCAAATCCTGATTGCTCAGCGGGTGGGAGCGTGGCTCAGCCCGCCCGCCCGCCT  
 CACCACAAGCGGTTGGTTGCGGACGGGACTACACCGGTGATCCCTATGCCTAACAGCCTCCATGT  
 ATAGTTTATCATTAACTGGACATAAACATTAATCTGTTACCTAAACCATTAAATTATTGATTTGTTA  
 CATAACCGACATTACACAATGTCATAAATTATTGCTACATTAATACAGTTCAGAGTCCACTTATGTA  
 AGTGTTCATGCGGGTGCAGTTCATGCGTCTGTCAGAGGTGAAGCAAAGTGTACACGGACCGGCA  
 GATGAGCAGGAACAGACGGGAAACCGCGTAAAGAGAGGTGCGCCCGTGGTTCGGACCGGTACCGCAG  
 ACCAAGAAGGGGACGATAGAGTCCCAAGCGGCCCGGGAGGGGTGCTCCGAGGATTTCAGCGCGAC

# Chromosome 12

## Allele A: integration site

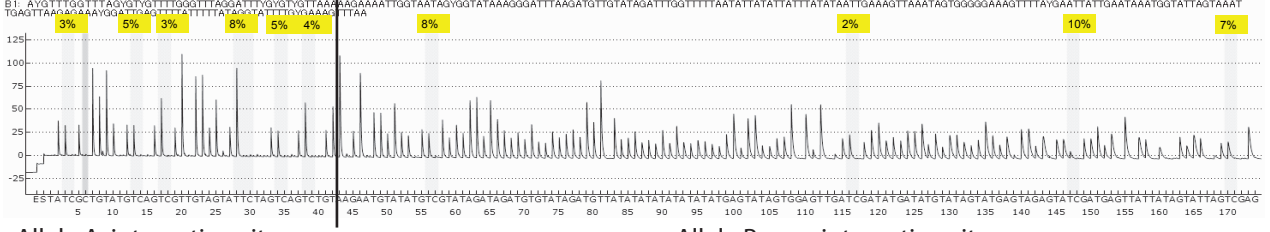

## Allele A: integration site

Sense GAGTTGGGTAATTTAGTTATAGAAGT  
 Anti-sense CCTATATCCCATCCCATCATCT  
 Sequencing AATTGAGTTATAGAAGTTGG

## Allele B: non-integration site

Sense TTTTAGAGTTGGGTAATTTAGTTATAGAA  
 Anti-sense AAATACAACRCCTCCTCCCTTAAA  
 Sequencing GGGTAAATTTAGTTATAGAAG

## Allele A: integration site

TGTACTATGAGCTAAGTACTATCGTGATCCCAATTCCTAGAAAACTGAGGCTCAGAGCGGGAAAT  
 CCCCTTGTCTGTCAAGCTCAAATCAAGACTGTCAGATTGAGGTTCGCCATCCCTCGGGCAAGACT  
 CTCAGAGCTGGGTAACTGAGCCACAGAAGCTGGACCGCTGGCTCAGCGTCTGCTGGGTCTAGGAC  
 CTTCGGCCCGCCAAAAAGAAAATTTGTAACAGCGGTATAAAGGACTCAAGATGTTGTACAGATTGG  
 CCCCCAATACCACATCATCCATAAAGTAAAGCAGTGGGGAAAGCCCTACGAACCACTGA  
 ACAAATGGCACTAGTAACTGAGCCAAAGAGAAAAGACTGAGCCCACTCCCATAGGATTTTTCGCA  
 AAGCCCAAGATGATGGGATGGGAATACAGTTGCAATTTCCATCCGTAGGTTTTGTACAGCAACATGA  
 GGGAAACATAGACCATGGAATGATGATATTTCCGAGAAAGGACCCACAGAATTATCAGTCCCGAT

## Allele A: integration site

GGCTTCGGCGCTCTGATTGGCTGGCCTGAAGTACAACGCCCTCCTCCCTTGGAGCACGGGCGCTCTG  
 GGTGTGGGAGTTGGGGAGCTGCTCCGGCTTCGCGCGGAGGGGGCGGCGCCGGGGAGGCGGCGGG  
 GCGGACAGGTGAGAGGCCTGGCTGATGGTCCACCATTTTATGCCTAACAGCCTCCATGTATAGTTTA  
 TCATTAACCTGGACATAAACATTAATCTGTTACCTAAACCATTAAATTATTGATTTGTTACATAACCG  
 ACATTACACAATGTCATAAATTATTGCTACATTAATACAGTTCAGAGTCCACTTATGTAAGTGTTCAT  
 TGGCGGGTGCAGTTCATGCGTCTGTCAGAGGTGAAGCAAAGTGTACACGGACCGGCAGATGAGCA  
 GGAACAGACGGGAAACCGCGTAAAGAGAGGTGCGNCCCGTGGTCCGACCGTACCGCAGACCGAAGAA

## Allele A: integration site

Sense GTTTTATTGGTTGGTTTGAAGT  
 Anti-sense ACTAACACCCCCATAAACACTTACAT  
 Sequencing ATTGGTTGGTTTGAAGTA

## Allele B: non-integration site

Sense TTTTATTGGTTGGTTTGAAGTA  
 Anti-sense CTCTCAAACATAAATAAACCAACACAAA  
 Sequencing ATTGGTTGGTTTGAAGTATA





Supplementary Figure 8

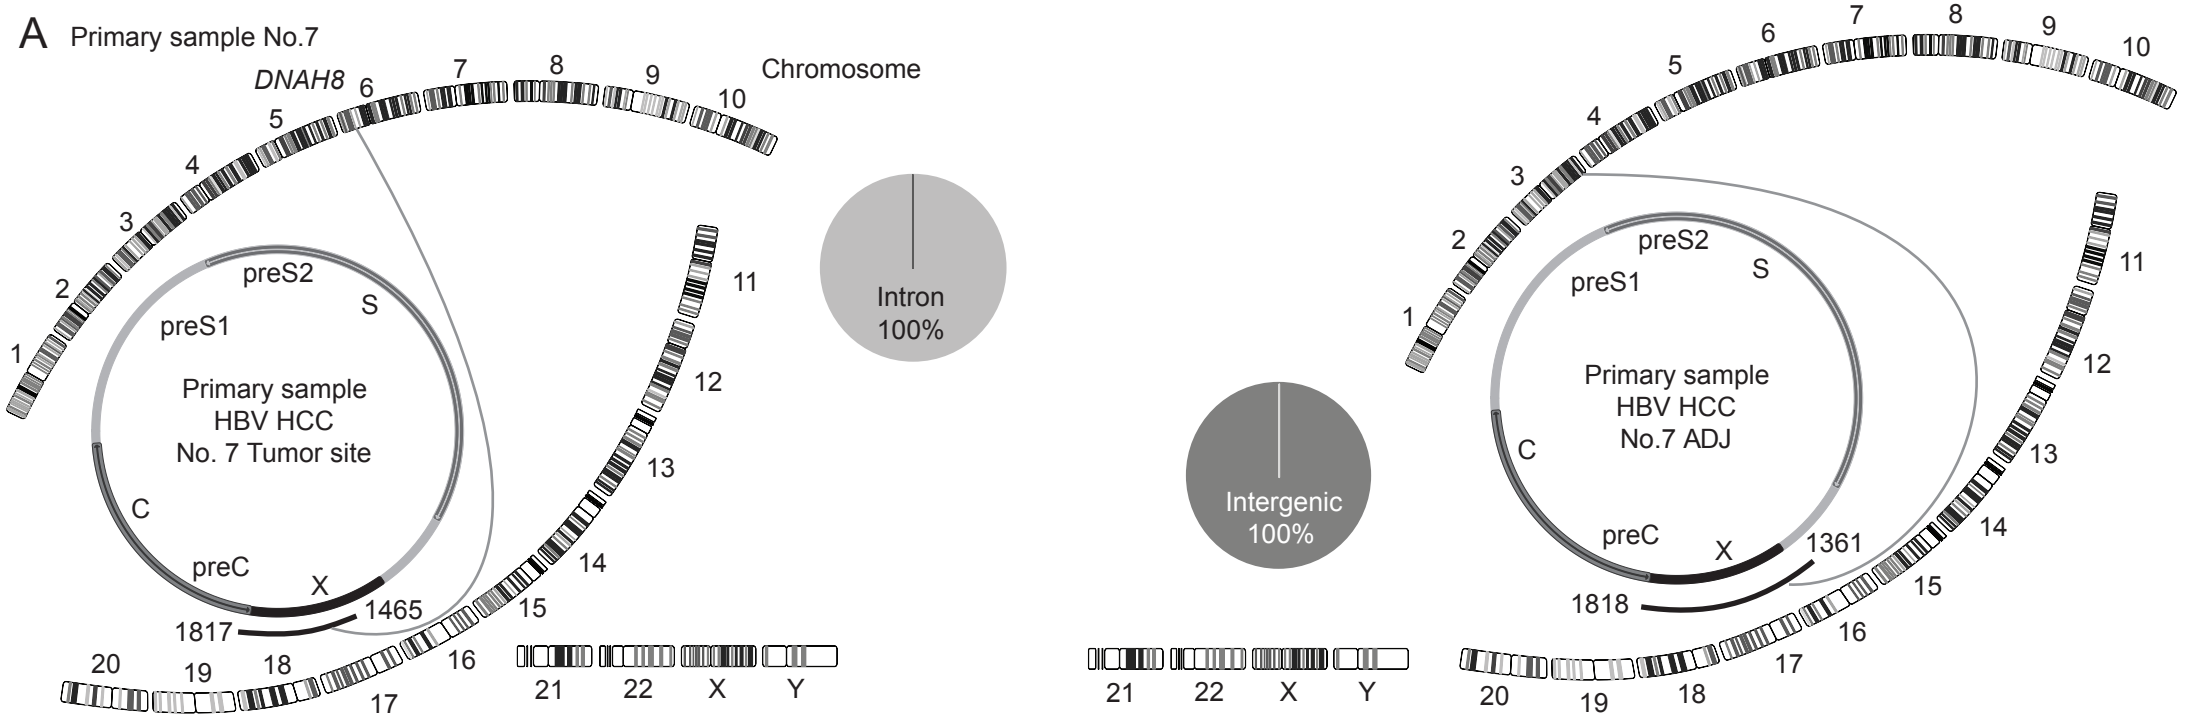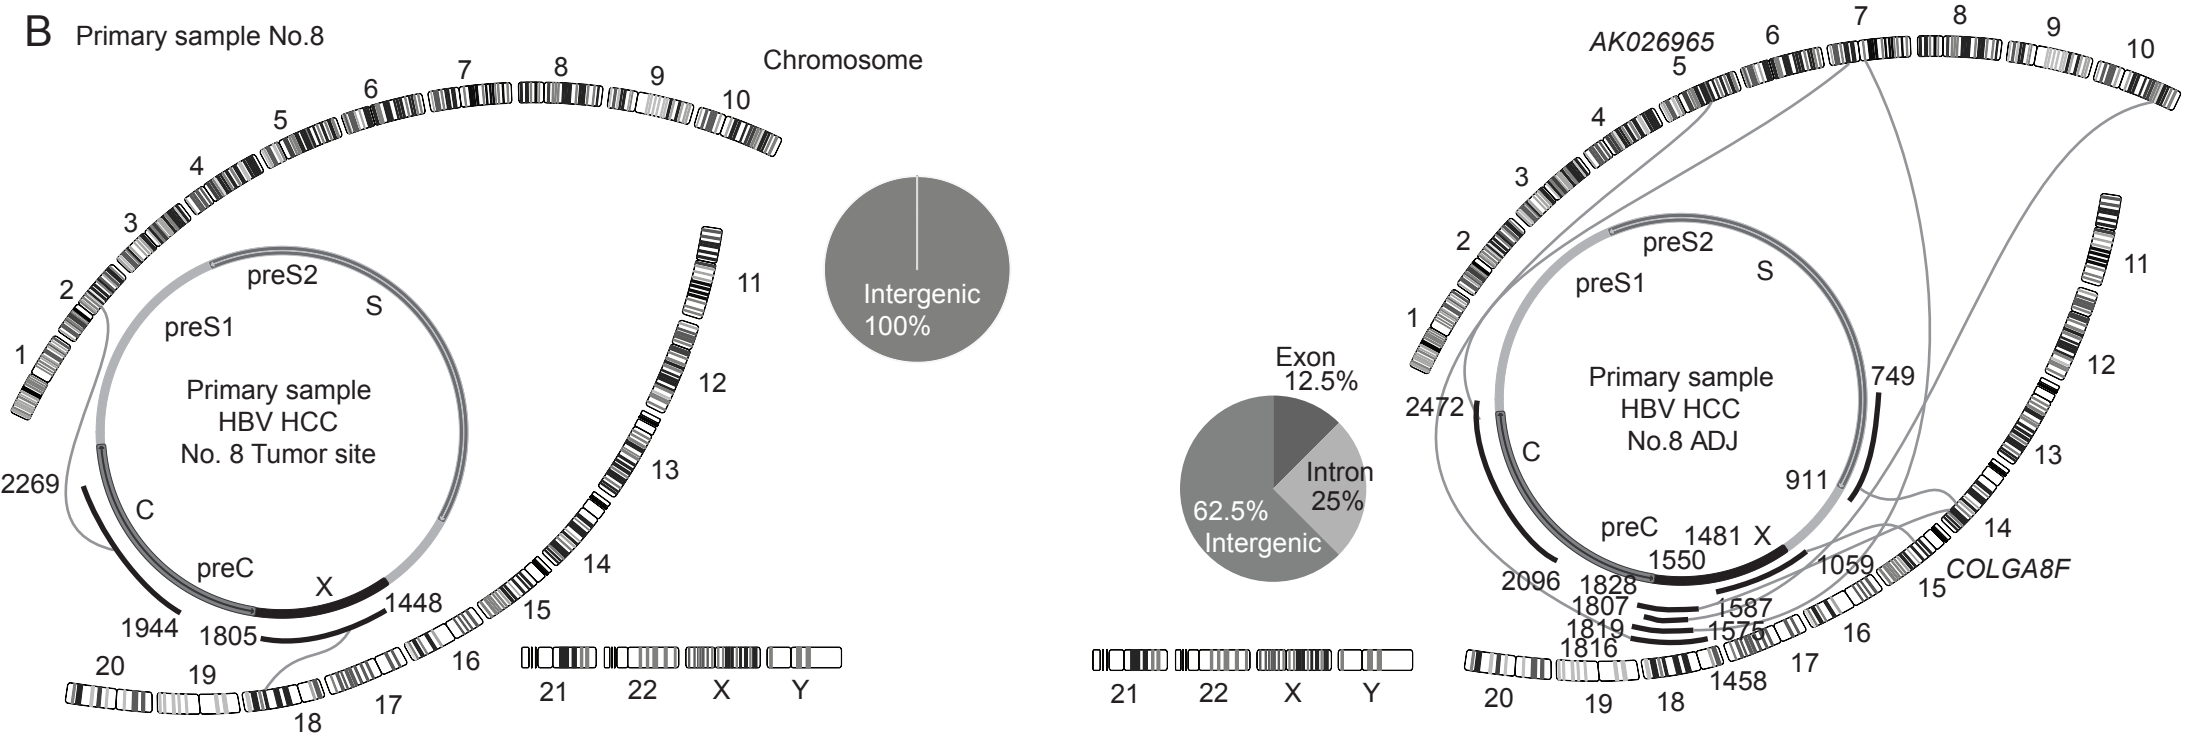

Supplementary Figure 8

C Primary sample No.9

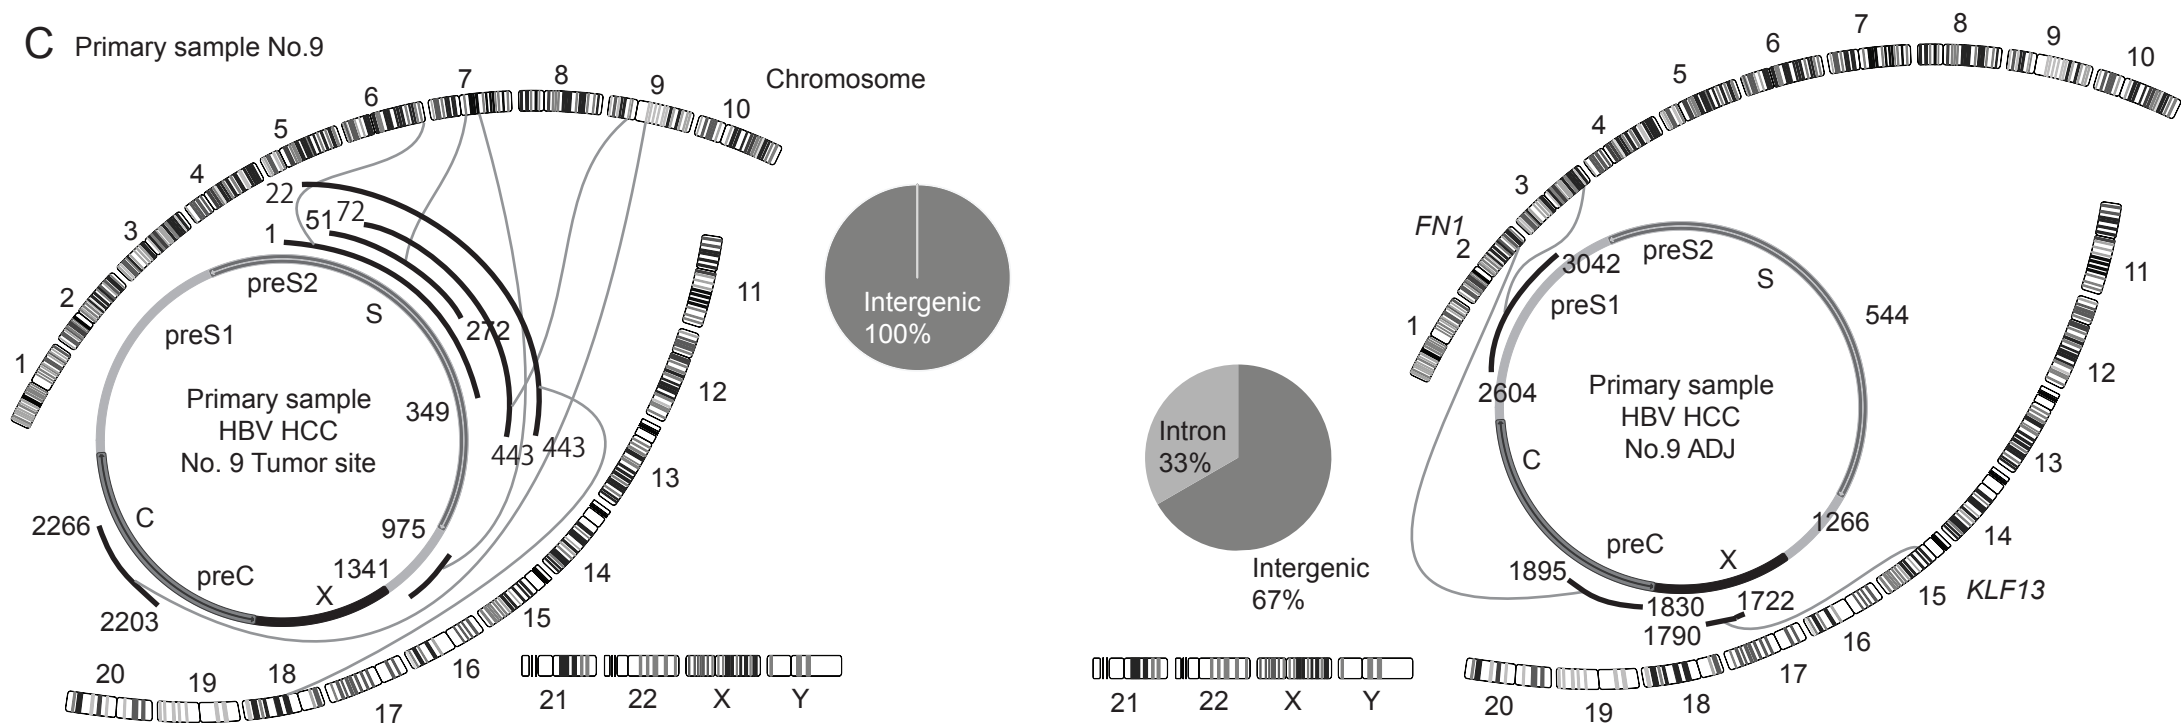

D Primary sample No.10

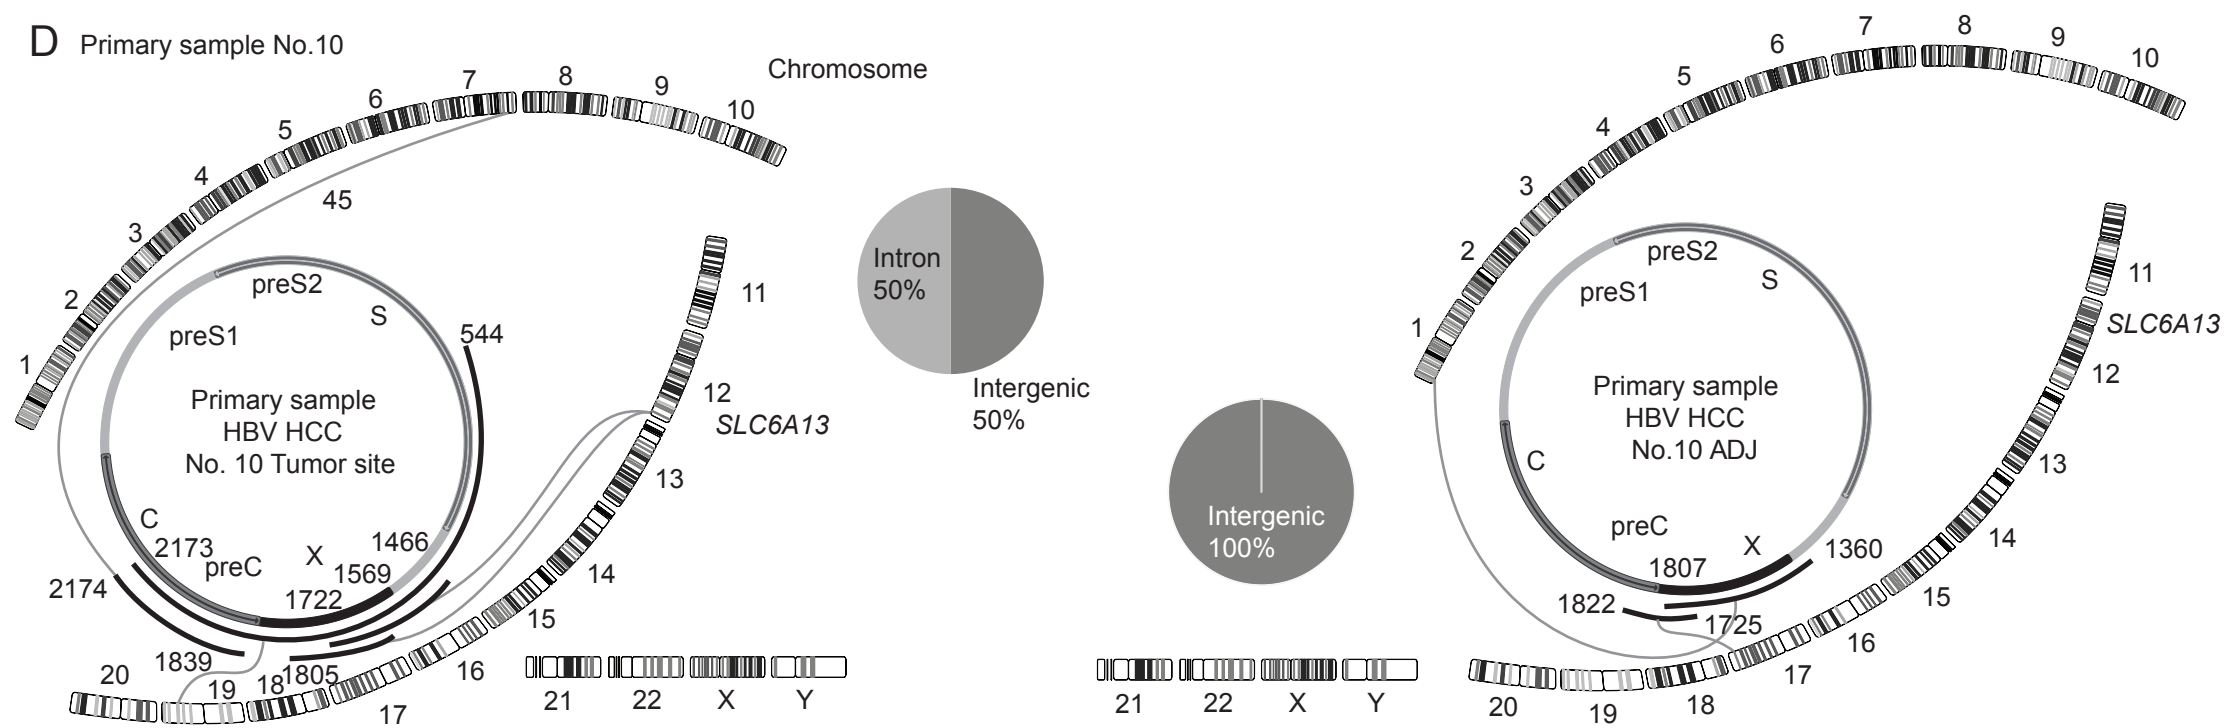

Supplement: supp_gr.175240.114_Supp_Material.pdf [file supp_gr.175240.114_Supp_Material.pdf]
